1

2

3

4

5

6 **Transcriptome profiling of the branchial arches reveals cell type composition**

7 **and a conserved signature of neural crest cell invasion**

8

9 Jason A Morrison<sup>1</sup>, Rebecca McLennan<sup>1</sup>, Jessica M Teddy<sup>1</sup>, Allison R Scott<sup>1</sup>, Jennifer C

10 Kasemeier-Kulesa<sup>1</sup>, Madelaine M Gogol<sup>1</sup>, Paul M Kulesa<sup>1,2\*</sup>

11 1. Stowers Institute for Medical Research, Kansas City, MO, 64110, USA

12 2. Department of Anatomy and Cell Biology, University of Kansas School of Medicine,  
13 Kansas City, KS, 66160, USA

14 \*corresponding author: [pmk@stowers.org](mailto:pmk@stowers.org)

15 27 February, 2020

16 **Running title:** Transcriptome profiling of the branchial arches

17

18

19

20

21 **ABSTRACT**

22 The vertebrate branchial arches that give rise to structures of the head, neck, and heart form  
23 with very dynamic tissue growth and well-choreographed neural crest, ectoderm, and  
24 mesoderm cell dynamics. Although this morphogenesis has been studied by marker expression  
25 and fate-mapping, the mechanisms that control the collective migration and diversity of the  
26 neural crest and surrounding tissues remain unclear, in part due to the effects of averaging and  
27 need for cell isolation in conventional transcriptome analysis experiments of multiple cell  
28 populations. We used label free single cell RNA sequencing on 95,000 individual cells at 2  
29 developmental stages encompassing formation of the first four chick branchial arches to  
30 measure the transcriptional states that define the cellular hierarchy and invasion signature of the  
31 migrating neural crest. The results confirmed basic features of cell type diversity and led to the  
32 discovery of many novel markers that discriminate between axial level and distal-to-proximal cell  
33 populations within the branchial arches and neural crest streams. We identified the  
34 transcriptional signature of the most invasive neural crest that is conserved within each  
35 branchial arch stream and elucidated a set of genes common to other cell invasion signatures in  
36 types in cancer, wound healing and development. These data robustly delineate molecularly  
37 distinct cell types within the branchial arches and identify important molecular transitions within  
38 the migrating neural crest during development.

39

## 40 INTRODUCTION

41 During vertebrate development, multipotent neural crest cells migrate in discrete streams from  
42 the dorsal neural tube to the periphery to form functional structures (Etchevers 2019). Mistakes  
43 in collective migration or cell differentiation of the neural crest can result in severe birth defects  
44 (Frisdal and Trainor 2014). Therefore, to understand how a healthy individual develops, it is  
45 important that we understand how this coordinated movement of cells is controlled. Moreover,  
46 the neural crest is a well-known in vivo model to test hypothetical mechanisms described in  
47 other cell invasion phenomena, such as cancer and wound healing, since migrating cells are  
48 accessible to time-lapse imaging, molecular perturbation and profiling (Kulesa 2013a,b). Thus,  
49 knowledge of the cellular and molecular mechanisms underlying neural crest cell migration will  
50 lead to a better understanding of structural birth defects and insights into the hallmarks of  
51 collective cell motion that is prevalent throughout development and disease.

52  
53 Neural crest cell migration begins at the midbrain and continues in a rostral-to-caudal manner  
54 all along the vertebrate axis. In the hindbrain, neural crest cells that emerge from rhombomere  
55 1 (r1) through r7 are shaped into discrete migratory streams that invade the first four branchial  
56 arches (BA1-4). These branchial arches are sculpted into important structures in the face, neck  
57 and heart (Frisdal and Trainor, 2014). Characterization of neural crest migration from time-lapse  
58 imaging data has revealed a rich set of cell behaviors that include cell contact guidance, contact  
59 inhibition of locomotion, chemotaxis and cell communication that together promote collective  
60 cell movement (Giniunaite 2019a; Giniunaite 2019b; Szabó and Mayor 2018). Signals within the  
61 dorsal neural tube and microenvironments through which cells travel are coordinated in space  
62 and time to control cell exit locations, prevent stream mixing, and direct cells into the correct  
63 branchial arch (Kulesa and McLennan, 2015). Despite the wealth of cell behavioral data, much  
64 less is known about the network of genes that underlie this complex and well-choreographed

65 cellular hierarchy and collective migration of the neural crest.

66

67 To begin to address these questions, we previously conducted single cell analysis of cranial  
68 neural crest cells migrating into the second branchial arch (BA2) at three progressive  
69 developmental stages: delamination from the dorsal neural tube, migration and BA2 invasion.  
70 We showed that gene expression is dynamic within the neural crest cell migratory stream and  
71 depends on cell position and time after exit from the neural tube (McLennan 2012; McLennan  
72 2015a,b; Morrison 2017a). We identified gene expression differences in leader versus follower  
73 neural crest cells, including a consistent transcriptional signature associated with a subset of  
74 cells at the invasive front, which we termed ‘Trailblazers’ (Morrison 2017a). Since discrete  
75 neural crest cell migratory streams populate the first four branchial arches and form distinct  
76 structures, it is important to understand the degree of similarity and differences in the molecular  
77 heterogeneity within the first four branchial arch streams. Further, it is unclear how signals in the  
78 branchial arch microenvironments are coordinated to drive collective migration and cell type  
79 diversity.

80

81 In this study, we take advantage of methods that permit label free single cell RNA sequencing  
82 (scRNA-seq) to efficiently profile populations of individual cells in complex tissues. Specifically,  
83 we measure transcriptional states of migrating neural crest cells and surrounding tissues from  
84 BA1-BA4 of chicken embryos at 2 developmental stages. To guide bioinformatics analysis and  
85 aid in the identification of neural crest and other cell types, we utilized our previously generated  
86 gene expression database of the BA2 neural crest cell migratory stream as a reference  
87 (McLennan 2012; McLennan 2015a,b; Morrison 2017a). This approach enabled us to determine  
88 spatio-temporal gene expression profiles and compare differences in front (distal 20%) and back

89 (proximal 80%) cell subpopulations within all four branchial arches. We uncovered profiles  
90 associated with the molecular transition to the most invasive neural crest cells and identification  
91 a distinct transcriptional signature of these cells. An integrated multiplexed fluorescence in-situ  
92 hybridization strategy (Morrison 2017b) enabled us to examine a subset of Trailblazer genes,  
93 validate the analyses and investigate changes in in vitro neural crest cell behaviors after loss-of-  
94 function of a small subset of Trailblazer genes. Lastly, through comparisons with published gene  
95 expression signatures from a wide range of other cell invasion phenomena our analyses identify  
96 a subset of genes shared with the neural crest Trailblazer signature. These results represent a  
97 comprehensive analysis of the cellular hierarchy and molecular heterogeneity of the migrating  
98 neural crest and BA1-BA4 tissues during vertebrate development.

99

100

## 101 **RESULTS**

### 102 **Label free and unsorted scRNA-seq identified distinct cell types within BA1-BA4**

103 We previously demonstrated that cranial neural crest cells that exit from the mid-hindbrain and  
104 travel to BA2 express a subset of genes that depend on cell position within the migratory stream  
105 and the timing of their emergence from the dorsal neural tube (Morrison 2017a). Neural crest  
106 cells within the front 20% (distal) subpopulation have a distinct transcriptional signature in  
107 comparison to the back 80% (proximal) neural crest cell subpopulation. These distinct molecular  
108 signatures vary in time as cells travel through different microenvironments to invade BA2. We  
109 also found that a subset of the invasive cells at the leading edge, termed 'Trailblazers', express  
110 a unique and consistent transcriptional signature throughout the migratory period. It was  
111 unknown whether these spatio-temporal molecular heterogeneities and the unique Trailblazer

112 transcriptional signature are also present within neighboring BA1, BA3, and BA4 neural crest  
113 cell migratory streams and what microenvironmental signals may underlie these profiles.

114

115 To address these questions, we expanded the single cell transcriptome analysis along the  
116 anterior-posterior axis to investigate patterns of expression within BA1-4 (Fig. 1A-B). We  
117 dissected chick BA1 and BA2 at Hamburger and Hamilton (HH)13 and BA3 and BA4 at HH15  
118 which represent developmental timepoints during neural crest cell migration and branchial arch  
119 formation (Hamburger and Hamilton 1951). Each branchial arch microenvironment was  
120 subdivided into the front and the back (Fig. 1A-B). scRNA-seq (10x Genomics Chromium) and  
121 bioinformatic analyses (Seurat) of label free and unsorted branchial arch tissues produced  
122 approximately 95,000 single cell transcriptional profiles, containing cell types such as ectoderm,  
123 mesoderm, and migrating neural crest cells (Butler 2018) (Fig. 1B and Suppl. Fig. 1). We next  
124 utilized Uniform Manifold Approximation and Projection (UMAP) analysis to display the  
125 transcriptomes as 7 distinct clusters, with each of the clusters marked by increased expression  
126 of unique genes (Becht 2019; McInnes 018) (Fig. 1C-F; Suppl. Table 1).

127

128

129

130

131

132

133

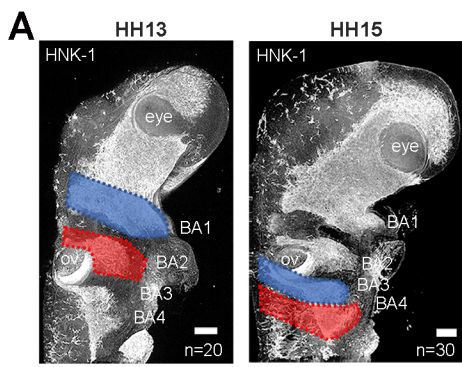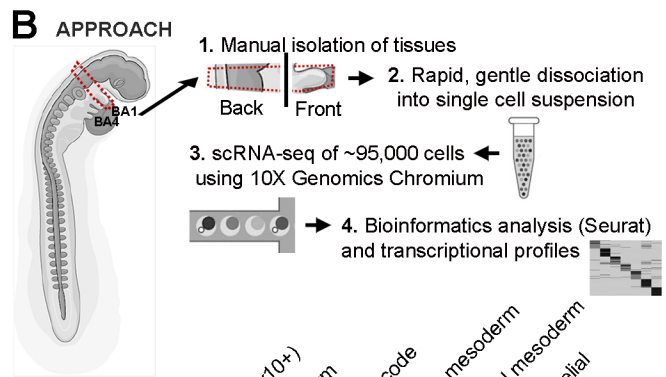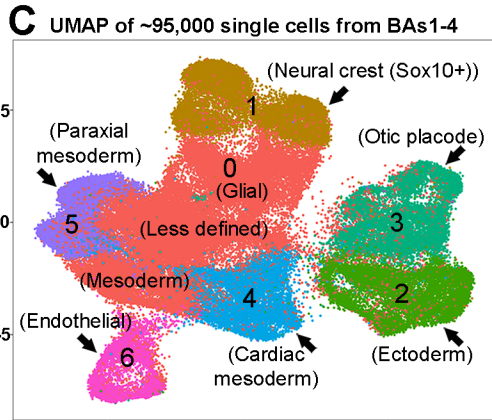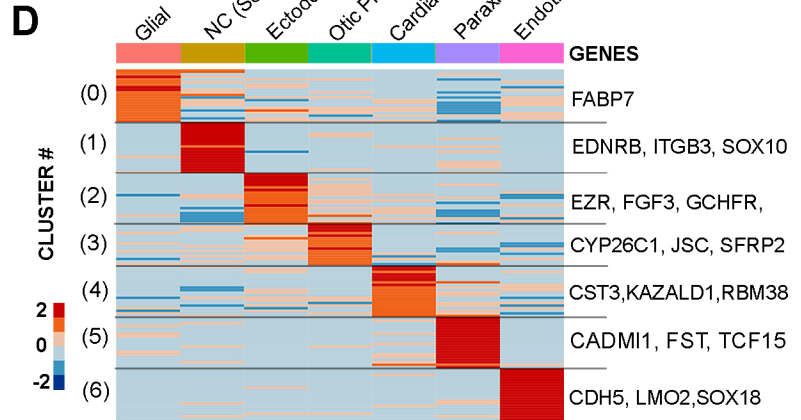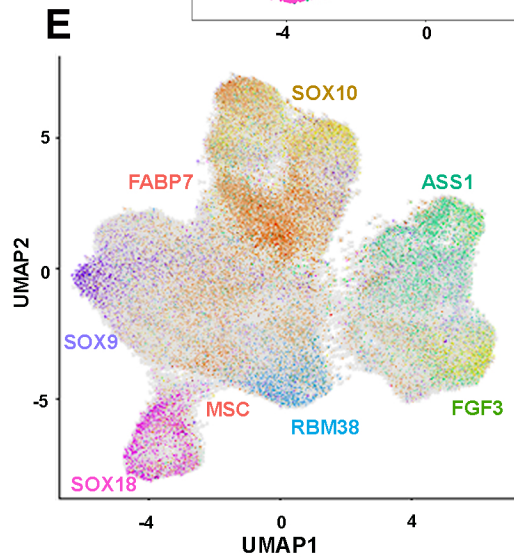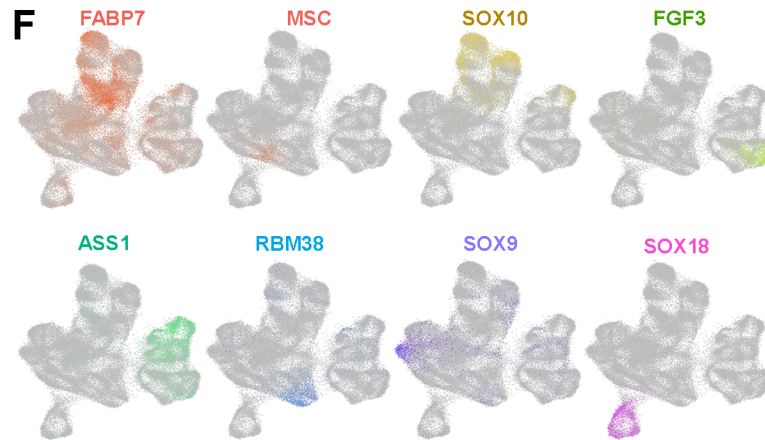

**G** Percent composition of each UMAP cluster by scRNA-seq sample

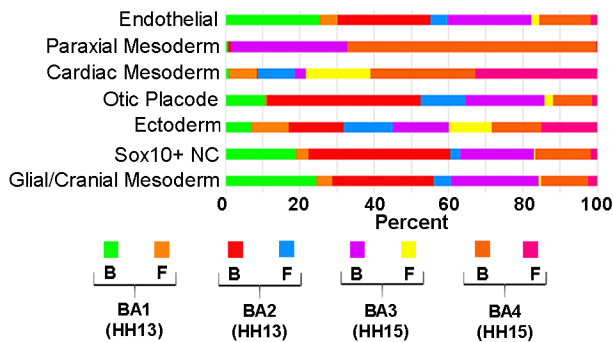

**H** Percent composition of each scRNA-seq sample by UMAP cluster

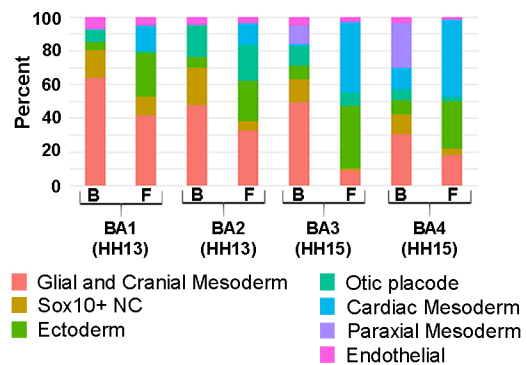

**Figure 1. Single cell sequencing identifies distinct cell types within embryonic**

**branchial arches.** (A) Unperturbed chick branchial arches (BA) 1-4 harvested for single cell RNA-seq analysis during active neural crest migration. (B) Isolation, scRNA-seq and bioinformatic analysis of BA1-4 (C) UMAP segregates ~95,000 single cell transcriptomes from BA1-4 into 7 clusters. (D) 7 clusters of BA1-4 cells are distinguished by upregulation of marker genes. (E-F) UMAP of all BA1-4 single cell transcriptomes color-coded by expression of individual genes that mark specific clusters. (G) Contribution of each spatially segregated sample to each of the 7 UMAP clusters. (H) Cell type composition of each of the spatially segregated scRNA-seq samples. Branchial Arch (BA); Hamburger & Hamilton chick developmental stage (HH); Neural Crest (NC); Front (F); Back (B).

134

135 In order to more fully characterize these 7 clusters, including the spatial location of the clusters  
136 within the context of the developing embryo conferred by the 8 spatially unique samples (Fig.  
137 1A,B), we determined the contribution of each sample to each cluster (Fig. 1G, Suppl. Table 2).  
138 The paraxial mesoderm cluster is dominated by cells from the back of BA3-4 and most of the  
139 cardiac mesoderm cluster is made up of cells from BA3-4 (Fig. 1G). Contributions to endothelial,  
140 ectodermal, SOX10-positive neural crest, glial and mesodermal cells are observed from all  
141 branchial arches analyzed.

142

143 To better understand the types of cells and tissues that exist at each anatomical location within  
144 BA1-4, we calculated the percentage composition of each of the 8 scRNA-seq samples (Fig.  
145 1H). The front of each branchial arch contained a higher percentage of ectodermal cells than  
146 the back and conversely, the back of each branchial arch had a higher percentage of glia and



147 cranial mesoderm than the front. The percentage of endothelial cells was consistent across all  
148 samples. As noted in Fig. 1G, paraxial mesoderm was almost exclusive to the back samples  
149 from BA3-4 and cardiac mesoderm was preferentially found in cells from BA3-4 (Fig. 1H).

150

### 151 **Expression of segmental HOX genes validates scRNA-seq of cranial to cardiac branchial** 152 **arches**

153 To further characterize the scRNA-seq analysis of BA1-4 tissue, we examined the axially-  
154 restricted profiles of expression of Homeobox (HOX; HOXA2, HOXA3, HOXB3), Distal-less  
155 Homeobox 5 (DLX5), and MAF BZIP Transcription Factor B (MAFB) genes (Suppl. Fig. 2A-F).  
156 When isolating BA1-4 tissue for scRNA-seq, both axial level and proximal-distal spatial  
157 information was maintained within individual samples (Fig. 1A-B). The SOX10-positive neural  
158 crest cells (cluster 1) segregates into 3 distinct subclusters corresponding to the branchial  
159 arches that they invade (Suppl. Fig. 2A). To evaluate expression of known arch-specific HOX  
160 genes within cells from individual arches, we plotted the expression of DLX5, individual HOX  
161 genes and MAFB within the context of our UMAP (Suppl. Fig. 2B-F). DLX5 is expressed in all  
162 subclusters of SOX10-positive neural crest cells (Suppl. Fig. 2E), supporting previous bulk RNA-  
163 seq data (Simoës-Costa 2014). The SOX10-positive neural crest cell subcluster, composed of  
164 cells from BA1, is devoid of HOX expression, while. HOXA2 is specifically enriched in BA2 cells  
165 and the expression of HOXA3, HOXB3, and MAFB are restricted to BA3-4 (Suppl. Fig. 2A-F).  
166 These data confirm the appropriate localized expression of genes with well-characterized  
167 segmentation patterns within the hindbrain and validate the effectiveness of the dissection and  
168 isolation protocol.

169

170

**A** BA1/2 (pre-otic) vs BA3/4 (post-otic)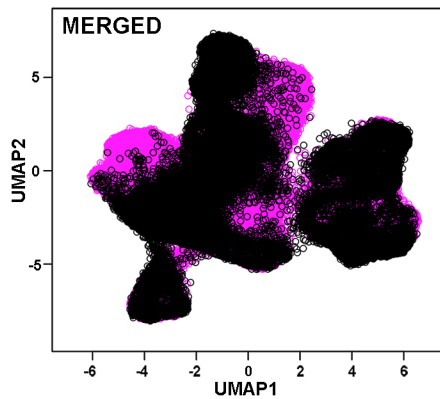**B**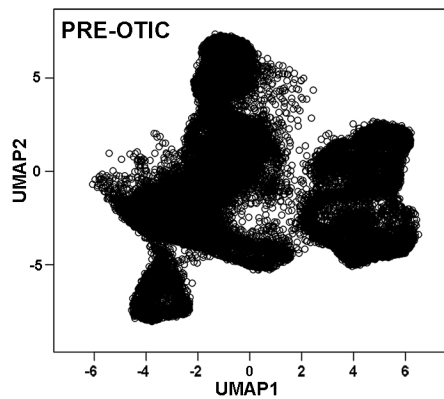**C**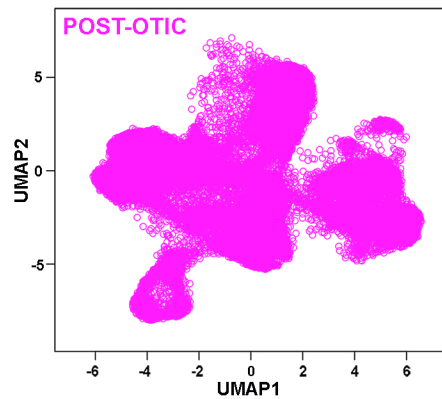**D**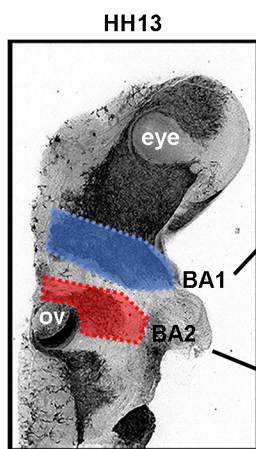**E**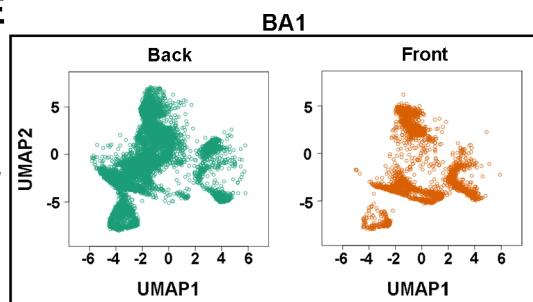**F**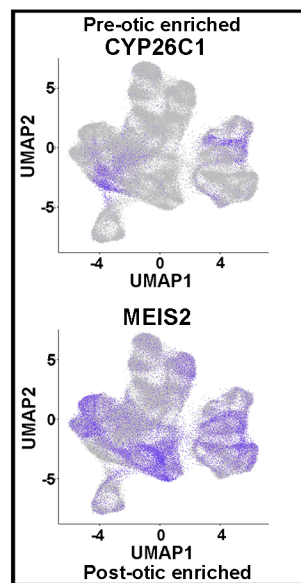**G**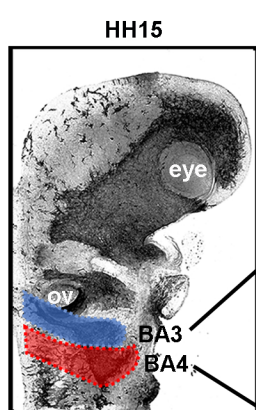**H**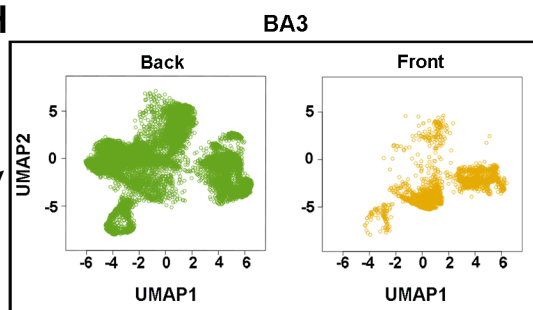**I**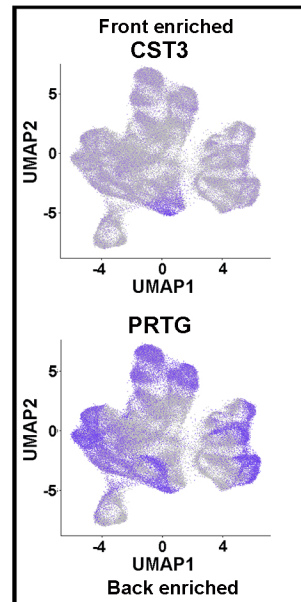**H**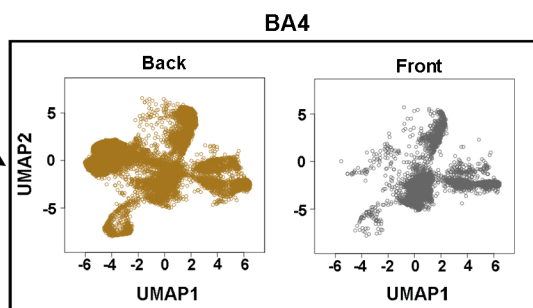

**Figure 2. Cellular composition is determined by axial level and position within each branchial arch (proximal vs distal).** (A-C) UMAP of BA1-4 single cell transcriptomes color-coded by pre-otic (black) or post-otic (magenta) location. (D) Unperturbed HH13 branchial arches 1-2 harvested for single cell RNA-seq analysis. (E) UMAP of BA1-4 single cell transcriptomes color-coded by contribution of HH13 BA1-2 Front and Back samples. (F) UMAP of BA1-4 single cell transcriptomes color-coded by expression of genes enriched in pre-otic (CYP26C1) and post-otic (MEIS2) cells. (G) Unperturbed HH15 branchial arches 3-4 harvested for single cell RNA-seq analysis. (H) UMAP of BA1-4 single cell transcriptomes color-coded by contribution of HH15 BA3-4 Front and Back samples. (I) UMAP of BA1-4 transcriptomes color-coded by expression of genes enriched in Front (CST3) and Back (PRTG) cells. Branchial Arch (BA); Hamburger & Hamilton chick developmental stage (HH).

171

172 **Neural crest cell type composition is determined by axial level and proximal-to-distal**  
173 **position within each branchial arch**

174 To better understand similarities and differences along the axis within BA1-4, we highlighted  
175 pre-otic and post-otic cells within the context of the 7 cluster UMAP (Fig. 2). We visualized the  
176 contribution of each spatially-restricted sample to the entirety of the UMAP (Fig. 2D-I) and find  
177 that both BA1-2 and BA3-4 cells supply ectoderm, otic placode, cardiac mesoderm and  
178 endothelial clusters. For example, endothelial cells are equally distributed among pre- and post-  
179 otic regions (Fig. 1G-H, 2A-C,E,H). Conversely, cells within SOX10-positive neural crest,  
180 cardiac mesoderm and paraxial mesoderm clusters segregate based upon their pre-otic and  
181 post-otic origin (compare differences in black and magenta regions in Fig. 2A-C). Cranial  
182 mesoderm marked by Cytochrome P450 Family 26 Subfamily C Member 1 (CYP26C1) showed

183 a dominant contribution from pre-otic cells as previously observed (Bothe 2011). Meis  
184 Homeobox 2 (MEIS2) expression is specific to post-otic cells, especially in SOX10-positive  
185 neural crest and paraxial mesoderm (Fig. 2A-H).

186

187 In a previous study, we identified distinct leader and follower neural crest molecular profiles  
188 within the BA2 neural crest cell migratory stream (Morrison 2017a). For comparison, we  
189 distinguished proximal and distal subregions of the arches within the context of the 7 cluster  
190 UMAP. There is a significant overlap between the front and back cells in ectoderm and  
191 endothelial clusters (Fig. 2E,H) suggesting a similar transcriptional signature for front and back  
192 cells within these clusters. In contrast, front and back cells displayed some spatial segregation  
193 within the cluster of SOX10-positive neural crest cells at each branchial arch level (Fig. 2E,H).  
194 Other clusters were also comprised of disproportionate numbers of front and back cells. For  
195 example, cardiac mesoderm showed a higher proportion of front cells and otic placode and  
196 paraxial mesoderm are primarily made up of cells at the back. Both of these results confirm  
197 known biological observations and further validate our scRNA-seq data. We next identified  
198 individual genes whose expression differed between front and back (Fig. 2I). CST3  
199 preferentially marks front cells of the cardiac mesoderm (cluster 4) and expression of the neural  
200 marker Protogenin (PRTG) is restricted to back cells within most clusters (Fig. 2I). These data  
201 suggest that gene expression is highly similar in some cell types (for example, ectoderm and  
202 endothelial) despite axial level and proximal-distal position. However other cell types, such as  
203 neural crest and mesoderm, show differential expression based upon axial level and/or  
204 proximal-distal position, in agreement with our previous analyses of BA2.

205

206

207 **Differences in SOX10 and other traditional markers in the most invasive cells**

208 Migrating neural crest cells are traditionally identified by the expression of neural crest genes,  
209 such as SOX10 or ITGB3 (Tucker 1984; Vincent 1983; Southard-Smith 1998; Pietri 2003).  
210 Hence, we examined their expression in clusters within the UMAP to identify which contained  
211 migrating neural crest cells. We observed expression of SOX10 in neural crest, glia and the otic  
212 placode (Fig. 1E-F; clusters 0,1,3). To confirm expression of SOX10 in the migrating neural  
213 crest cells and otic vesicle, we used multiplexed fluorescence in situ hybridization combined  
214 with immunohistochemistry for HNK-1 (neural crest-specific membrane marker) at two  
215 developmental time points (Fig. 3A-D) (Morrison 2017b). There is a striking reduction of SOX10  
216 at the invasive front of all four neural crest cell migratory streams (Fig. 3A-D). Higher  
217 magnification of the BA2 neural crest migratory stream at HH13 and HH15 distinctly illustrate  
218 this difference, as seen by comparing arrows denoting the distal-most HNK1-positive neural  
219 crest (turquoise) with asterisks marking a dramatic reduction in SOX10 expression (yellow) (Fig.  
220 3B,D). Novel markers of migrating neural crest cells were identified and included: Ubiquitin Like  
221 Modifier Acting Enzyme 7 (UBA7), Inositol-Tetrakisphosphate 1-Kinase (ITPK1), and Collagen  
222 Type XVIII Alpha 1 Chain (COL18A1) (Suppl. Fig. 2H). These results strengthen our previous  
223 observation that SOX10 expression appeared to be reduced as neural crest cells migrated  
224 further from the dorsal neural tube exit location and invaded BA2 (McLennan 2012; McLennan  
225 2015a,b; Morrison 2017a,b). Furthermore, they provide a new subset of markers for exploring  
226 temporal dynamic signatures in migrating neural crest cells.

227

228

229

230

231

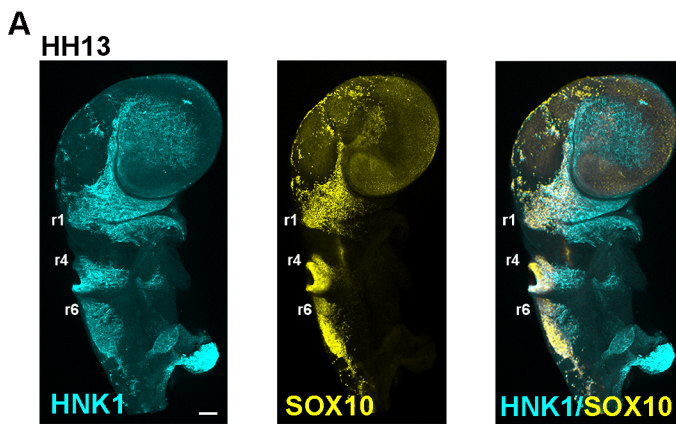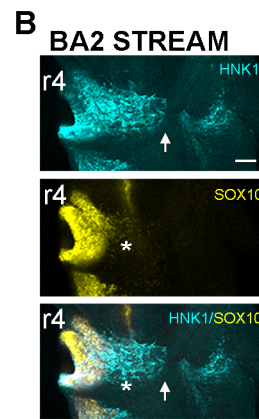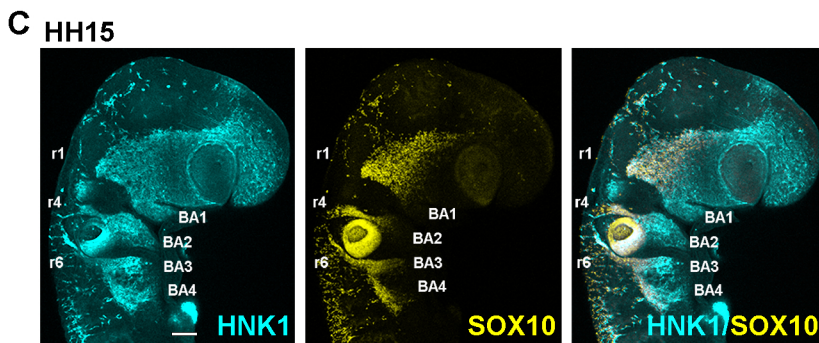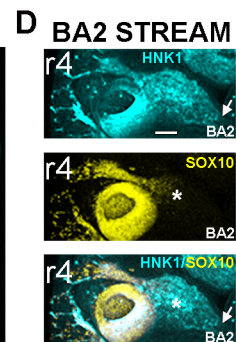

**E** Avg exp 964 genes enriched in Trailblazers

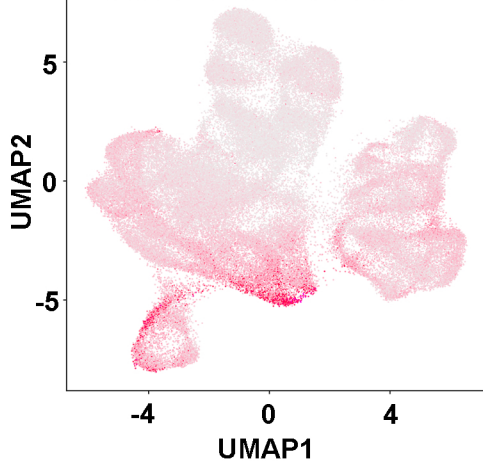

**F** Avg exp 406 genes reduced in Trailblazers

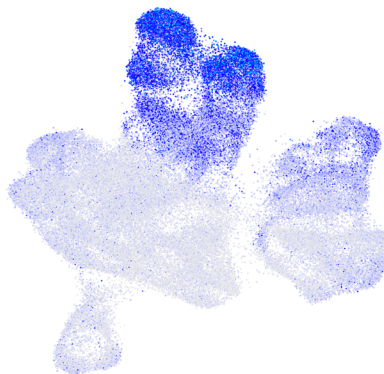

**G** Merged

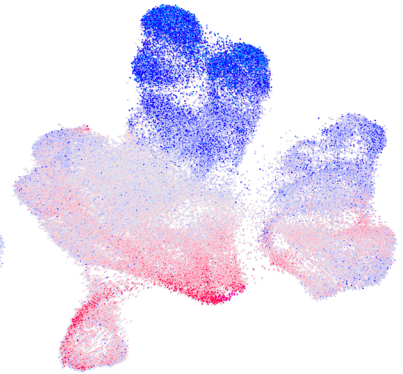

**Figure 3. SOX10+ neural crest cells contribute to multiple cell types and cells enriched for the Trailblazer neural crest profile exist at the distal portion of each branchial arch.** (A-D) At HH13 and 15, migrating all cranial-to-cardiac neural crest cells are strongly labeled by HNK-1 (arrows), while SOX10 expression (asterisks) inefficiently labels neural crest cells at the migratory front. (E) UMAP of BA1-4 single cell transcriptomes color-coded by the average expression of 964 genes enriched in BA2 Trailblazer NC cells compared to all other BA2 NC. (F) UMAP of BA1-4 single cell transcriptomes color-coded by the average expression of 406 genes reduced in BA2 Trailblazer NC cells compared to all other BA2 NC. (G) Merged images of E and F. Branchial Arch (BA); Hamburger & Hamilton chick developmental stage (HH); Rhombomeres 1-6 (r1-6). Scalebars are 100um (A,C) and 50um (B,D).

232

233 **The Trailblazer transcriptional signature is conserved within BA1-4 neural crest cell**  
234 **migratory streams**

235 Next, we explored whether the novel Trailblazer transcriptional signature associated with the  
236 most invasive neural crest cells migrating into BA2 is conserved in other branchial arches  
237 (Morrison 2017a). Since SOX10 and other commonly used neural crest markers are reduced in  
238 Trailblazers (Fig. 3A-D), we asked whether Trailblazers could be more accurately identified  
239 within the UMAP of BA1-4 tissue by employing the known BA2 Trailblazer molecular profile as a  
240 reference. The cardiac mesoderm and endothelial clusters (Fig. 1C; clusters 4 and 6,  
241 respectively) were enriched for an average of the 964 genes enriched in the BA2 Trailblazer  
242 signature (Fig. 3E). As cluster 6 distinctly expressed well-characterized markers of endothelial  
243 cells, such as SOX18, LMO2 and CDH5 (Fig. 1C-F; Fig. 3E; Suppl. Table 1), we instead  
244 focused our efforts to identify Trailblazer neural crest cells within the cardiac mesoderm cluster.  
245 Since the BA2 Trailblazer signature was originally determined by comparing Trailblazer cells

246 within BA2 to the other neural crest cell streams, enrichment of BA2 Trailblazer genes in the  
247 cardiac mesoderm cluster should be compared to expression within the SOX10-positive neural  
248 crest cluster (Fig. 1C; cluster 1). We observe that unlike the cardiac mesoderm cluster, the  
249 SOX10-positive neural crest cluster is not enriched for trailblazer genes, suggesting it may  
250 correspond to a more proximal population of neural crest cells (Fig. 3E). To further verify  
251 similarity of the cardiac mesoderm and BA2 Trailblazer molecular profiles, we looked at the  
252 average expression of the 406 genes reduced in the Trailblazer signature (Fig. 3F). There is a  
253 clear reduction of genes reduced in Trailblazers in the cardiac mesoderm cluster compared to  
254 the SOX10-positive neural crest cluster 1 (Fig. 1C; cluster 4 and Fig. 3G). These results suggest  
255 that Trailblazer neural crest cells are not part of the SOX10+ neural crest cluster (cluster 1),  
256 which appear to represent more proximal neural crest cells.

257

258

259

260

261

262

263

264

265

266

267

268

269

270



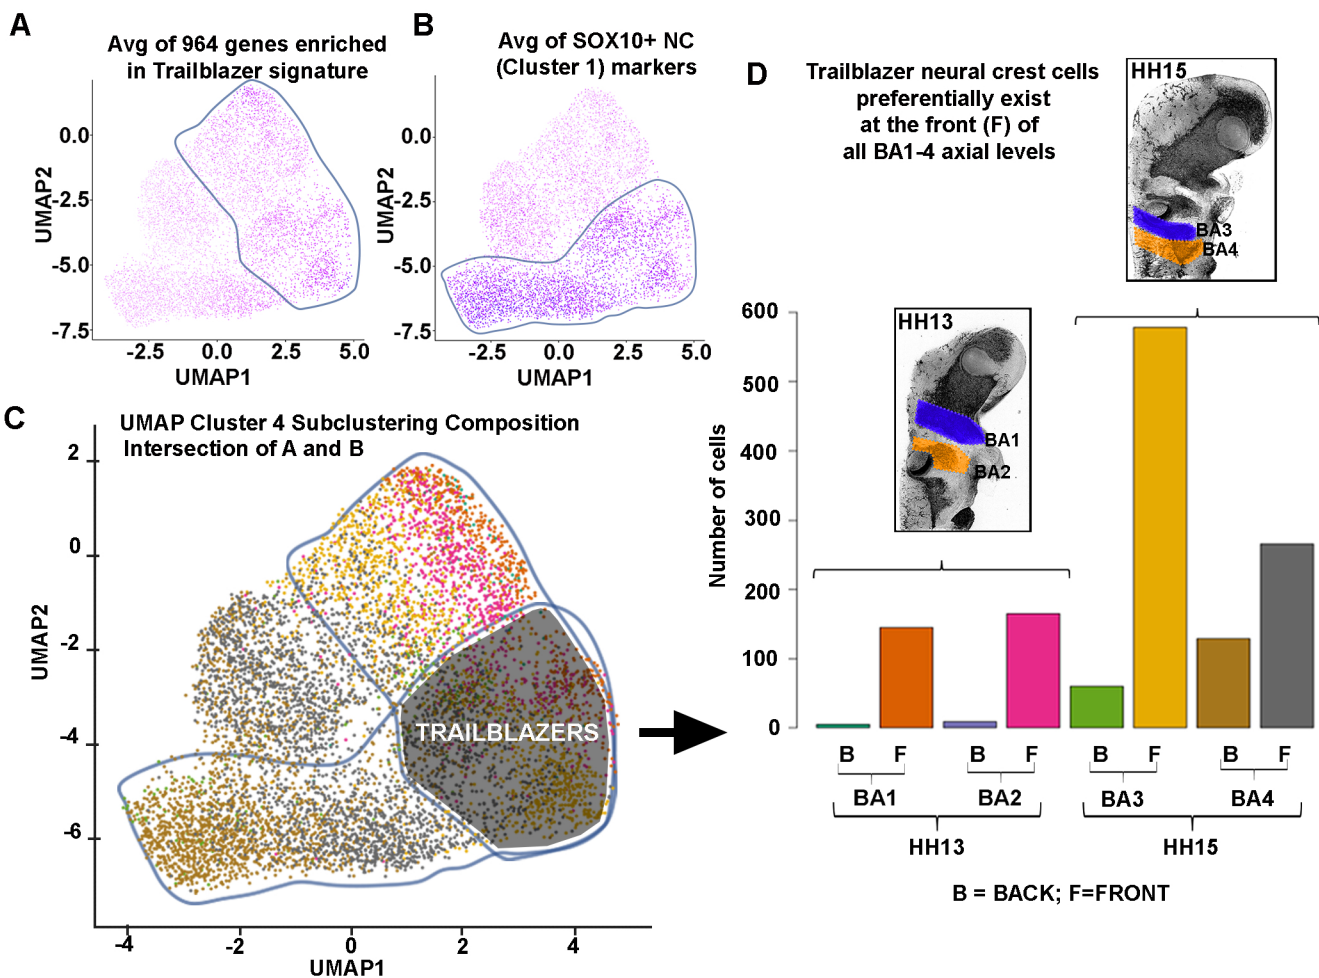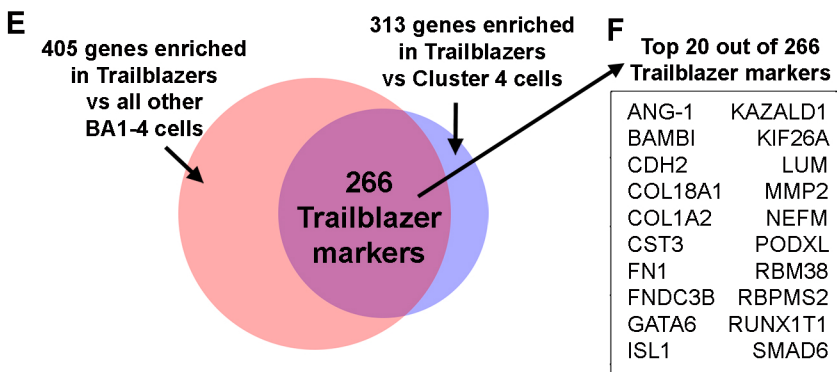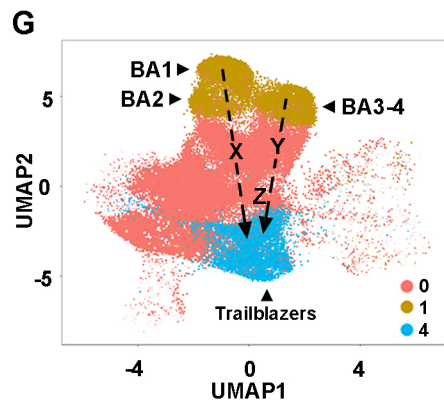

**H** Trailblazer markers (BA2) increase in the transition from Cluster 1 to Cluster 4

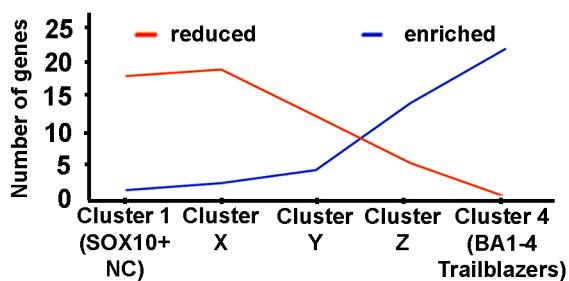

**I** Sample composition of BA1-4

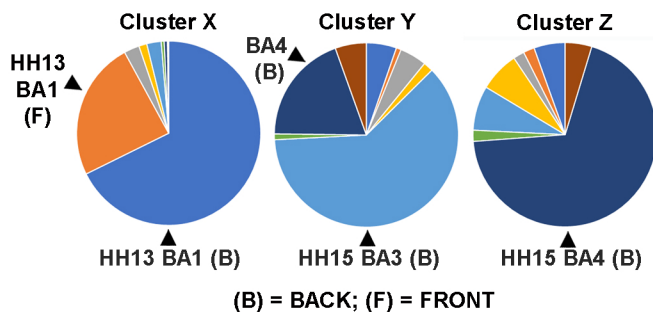

**Figure 4. Trailblazer neural crest signature refined by comparison with all branchial arch cells at multiple axial levels.** (A) A subset of cardiac mesoderm (cluster 4) cells is enriched for the average expression of 964 genes enriched in BA2 Trailblazer NC cells compared to all other BA2 NC. (B) A subset of cardiac mesoderm (cluster 4) cells is enriched for the average expression of SOX10+ neural crest markers. (C) The intersection of cells enriched for both BA2 Trailblazer and SOX10+ neural crest markers define BA1-4 Trailblazer NC cells. Cells of the cardiac mesoderm (cluster 4) are color-coded by sample type (developmental stage, branchial arch and position within the arch). (D) BA1-4 Trailblazer NC cells preferentially exist at the front of all branchial arches analyzed. (E) 266 markers of BA1-4 Trailblazers were found at the intersection of 405 genes enriched in BA1-4 Trailblazers compared to all other BA1-4 cells and 313 genes enriched in BA1-4 Trailblazers compared to all other cells in the cardiac mesoderm cluster. (F) Twenty BA1-4 Trailblazers compared to all other BA1-4 cells that are also enriched in BA1-4 Trailblazer NC cell markers. (G) UMAP of BA1-4 single cell transcriptomes showing SOX10-positive neural crest (cluster 1), Trailblazer neural crest (subset of cluster 4) and distinct subclusters between clusters 1 and 4 (X, Y and Z). (H) BA2 Trailblazer markers are enriched (blue) in the transition from SOX10+ neural crest to BA1-4 Trailblazer neural crest cells. Conversely, BA2 Trailblazer markers are reduced (orange) in the transition from SOX10+ neural crest to BA1-4 Trailblazer NC cells. (I) Sample composition of BA1-4 clusters containing neural crest cells. Branchial Arch (BA); Hamburger & Hamilton chick developmental stage (HH). Front (F); Back (B).

271

272

273

274 **Trailblazer neural crest cells exist at all axial levels analyzed**

275 The Trailblazer subpopulation of BA2 was a small percentage (~2%) of cells within the neural  
276 crest stream and confined to the invasive front (Morrison 2017a). Here, our analysis of all BA1-4  
277 tissue found a larger percentage (8%) of the cells that clustered as cardiac mesoderm (Suppl.  
278 Table 2). The cardiac mesoderm cluster (cluster 4) also contained cells from the back (proximal)  
279 portion of BA3-4 (Fig. 1G-H, Suppl. Table 2). These observations suggested that cluster 4 may  
280 contain both Trailblazer neural crest in addition to mesodermal cells. To explore the molecular  
281 heterogeneity within the cardiac mesoderm cluster, we independently clustered only the cardiac  
282 mesoderm cells, and color-coded the resulting single cell transcriptomes by sample types that  
283 confer both spatial and temporal information (Fig. 4C, Suppl. Fig. 4). We find that single cell  
284 transcriptomes on the left side of the subclustering composition UMAP for cluster 4 are almost  
285 exclusively comprised of front and back BA4 cells (Fig. 4C, Suppl. Fig. 4). Single cell  
286 transcriptomes on the right side of the plot contained front cells from all four branchial arches  
287 and very few back cells.

288

289 To determine if the cardiac mesoderm contained Trailblazer neural crest cells, we first examined  
290 the expression of the BA2 Trailblazer signature, which contained 964 genes enriched in  
291 Trailblazer neural crest compared to other neural crest (Morrison 2017a). We find the average  
292 of specifically enriched BA2 Trailblazer markers in single cell transcriptomes on the right side of  
293 the cardiac mesoderm UMAP (Fig. 4A; circled), while the bottom portion of cardiac mesoderm  
294 cluster is enriched for the average of all SOX10-positive neural crest cell markers (Fig. 4B;  
295 circled). We utilized the overlap between of enriched BA2 Trailblazer and neural crest cell  
296 markers with the cardiac mesoderm cluster to assign a subpopulation as BA1-4 Trailblazer  
297 neural crest cells (Fig. 4C; intersection of circled subregions). To determine whether putative  
298 BA1-4 Trailblazers are present at each axial level and if they exist in the more proximal or distal  
299 portions of each neural crest cell migratory stream, we utilized the spatial information preserved

300 within the scRNA-seq data set. We find that BA1-4 Trailblazers are almost exclusively at the  
301 front of BA1-3 and preferentially at the front of BA4 (Fig. 4D). This analysis of BA1-4 Trailblazer  
302 neural crest cells approximated the same Front-Back ratio previously observed for BA2  
303 Trailblazers (Morrison 2017a).

304

305 Having identified BA1-4 Trailblazer neural crest cells, we sought to establish their molecular  
306 properties. To identify genes unique to BA1-4 Trailblazers, we first compared BA1-4 Trailblazers  
307 to all other BA1-4 cells analyzed by scRNA-seq and found 405 genes enriched in the BA1-4  
308 Trailblazer neural crest cells (Fig. 4E; pink circle). Next, we compared BA1-4 Trailblazer neural  
309 crest to the transcriptionally similar cardiac mesoderm cells and identified 313 genes enriched in  
310 BA1-4 Trailblazer neural crest cells (Fig. 4E; blue circle). At the intersection of these two gene  
311 lists are 266 definitive BA1-4 Trailblazer neural crest cell markers (Fig. 4E; magenta circle,  
312 Suppl. Table 3) and the top 20 out of 266 genes shown in Fig. 4F). This analysis clearly  
313 demonstrates that there is a shared Trailblazer signature for the most invasive neural crest cells  
314 in all four branchial arches, indicating that is a conserved property of migrating cranial neural  
315 crest streams.

316

317

318

319 **SOX10-positive to Trailblazer neural crest trajectories contain intermediate**  
320 **subpopulations with reduced multipotency (SOX10) and increased Trailblazer markers**

321 In order to more clearly understand the timing of changes in multipotency within migrating  
322 neural crest cells, we focused on changes in SOX10 expression. The scRNA-seq analysis of  
323 BA2 neural crest cells showed two distinct transcriptional profiles of recently emigrated cells  
324 harvested at HH11, corresponding to recent neural tube exit and acquisition of directed  
325 migration (Morrison 2017a). When we closely examined our results at HH11, we observed little

326 or no SOX10 expression in cells with a 'pre migratory' neural crest cell signature, however,  
327 SOX10 was always part of the directed migration expression signature (Suppl. Fig. 3; HH11  
328 cluster 2 (blue bars) neural crest cells). Analysis of BA1-4 cells determined that traditional  
329 markers of migrating neural crest, including SOX10, LMO4, EDNRB, ITGB3 and Transcription  
330 Factor AP-2 Beta (TFAP2B), were enriched in cluster 1 (Fig. 1D-F; Suppl. Table 1) and to a  
331 lesser extent in the glial cluster marked by FABP7 (Fig. 1E-F).

332

333 The above results led us to further examine the reduction of multipotency markers in cranial-to-  
334 cardiac neural crest cells by analyzing the markers of subpopulations of cells along the axis of  
335 SOX10 expression (Fig. 4G; subpopulations X, Y and Z). As traditional neural crest cell markers  
336 are downregulated, markers associated with the BA2 Trailblazer neural crest cells emerge (Fig.  
337 4H; compare orange and blue lines plotted from Cluster 1 to Cluster 4). We then analyzed the  
338 composition of subclusters X, Y and Z. Strikingly, more than 90% of subcluster X comes from  
339 the front and back of BA1 (Fig. 4I). About 80% of the cells in subcluster Y come from the back of  
340 BA4 and BA3 and roughly 70% of subcluster Z is composed of cells from the back of BA4.  
341 These results map out two distinct trajectories within the UMAP, from BA1 through subcluster X  
342 and from BA3-4 through subcluster Y and subcluster Z (Fig. 4G; compare the two dotted lines).  
343 Further, it is important to note that less than 6% of cells in X, Y and Z originated in BA2,  
344 suggesting these interesting subpopulations may have escaped detection within our earlier  
345 study (that analyzed smaller cell numbers) of the BA2 stream. Overall, these results present an  
346 attractive hypothesis that cells within X, Y and Z represent axial-level specific transitions  
347 between proximal neural crest cells with high SOX10 expression and distal, leading edge  
348 Trailblazers.

349

350

351

352 **Fluorescence In Situ Hybridization confirms enrichment of Trailblazer markers in neural**  
353 **crest cells at the distal portion of all four branchial arches**

354 Enrichment of selected BA1-4 Trailblazer markers, including RNA Binding Motif Protein 38  
355 (RBM38), Neurensin 1 (NRSN1), Podocalyxin-like (PODXL), and KAZALD1 was first confirmed  
356 in the cardiac mesoderm cluster (Fig. 5A-E). To visualize the in vivo expression patterns of BA1-  
357 4 Trailblazer markers, we combined fluorescent in situ hybridization (RNAscope) with  
358 immunohistochemistry for the avian neural crest marker HNK-1 (Fig. 5F). To evaluate the  
359 heterogeneity of expression of the selected markers within a typical neural crest stream, we  
360 quantified expression within individual neural crest cells, focusing on the BA2 stream (Fig. 5F).  
361 We find expression of BA1-4 Trailblazer markers within individual neural crest cells after  
362 identification of individual neural crest cells using HNK-1 (Fig. 5F). Surprisingly in mesoderm  
363 tissues distal to the neural crest cell migratory stream we also find expression of BA1-4  
364 Trailblazer markers. For example, KAZALD1 is distinctly visible within the lead neural crest cells  
365 and in the tissue distal to the neural crest stream corresponding to lead cells within the cardiac  
366 mesoderm cluster (Suppl. Fig. 2G, 5A,C,F). NRSN1 expression was variable throughout the  
367 neural crest cell migratory stream, while expression of PODXL was enriched at the leading edge  
368 of the migratory front (Fig. 5F). We find lower expression of RBM38 within the neural crest  
369 stream, compared to the other BA1-4 Trailblazer genes selected. Thus, some Trailblazer  
370 markers confirm the position of Trailblazers at the leading edge of the migratory stream.  
371 Furthermore, the expression of some Trailblazer markers extends beyond the neural crest  
372 stream into the distal mesenchyme.

373

374

375

376

377

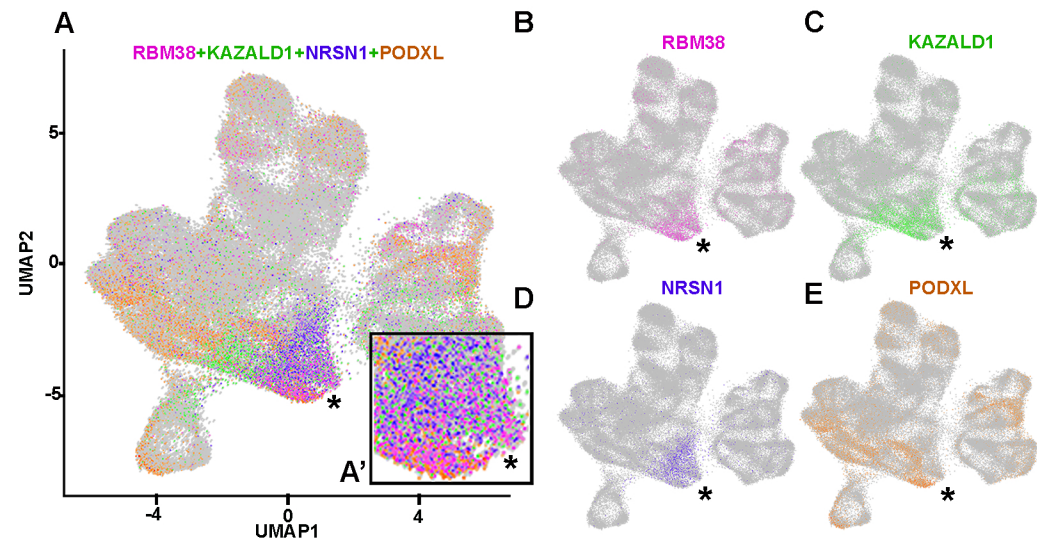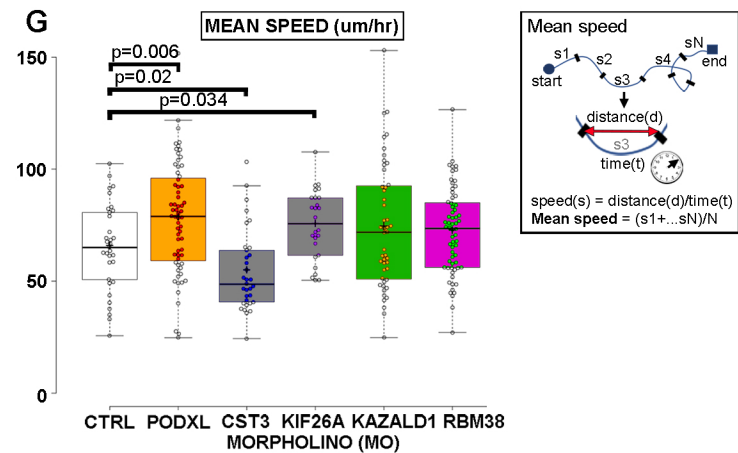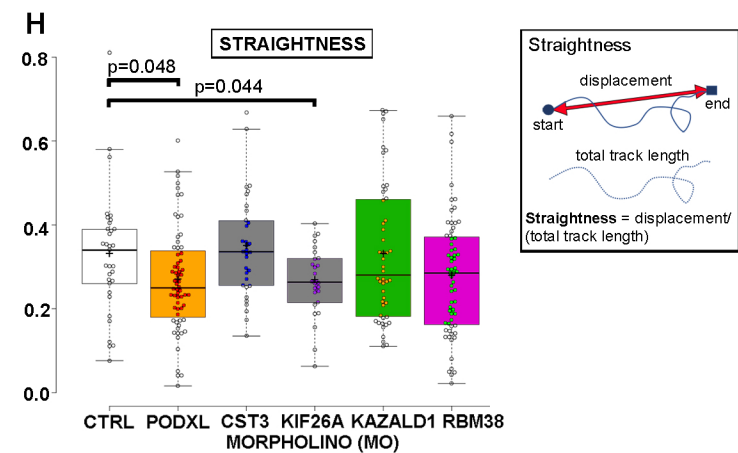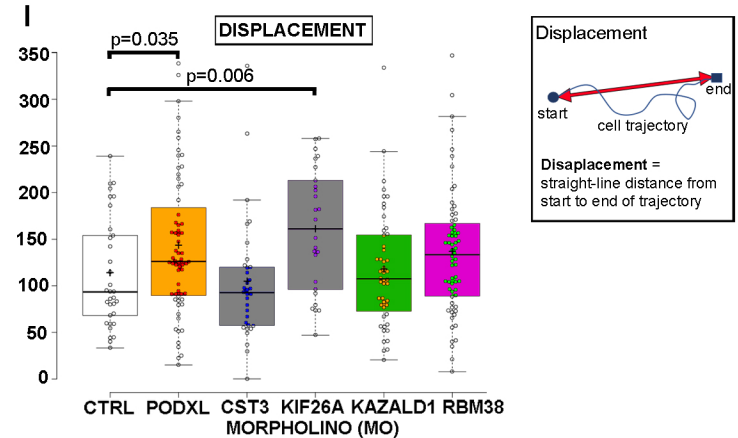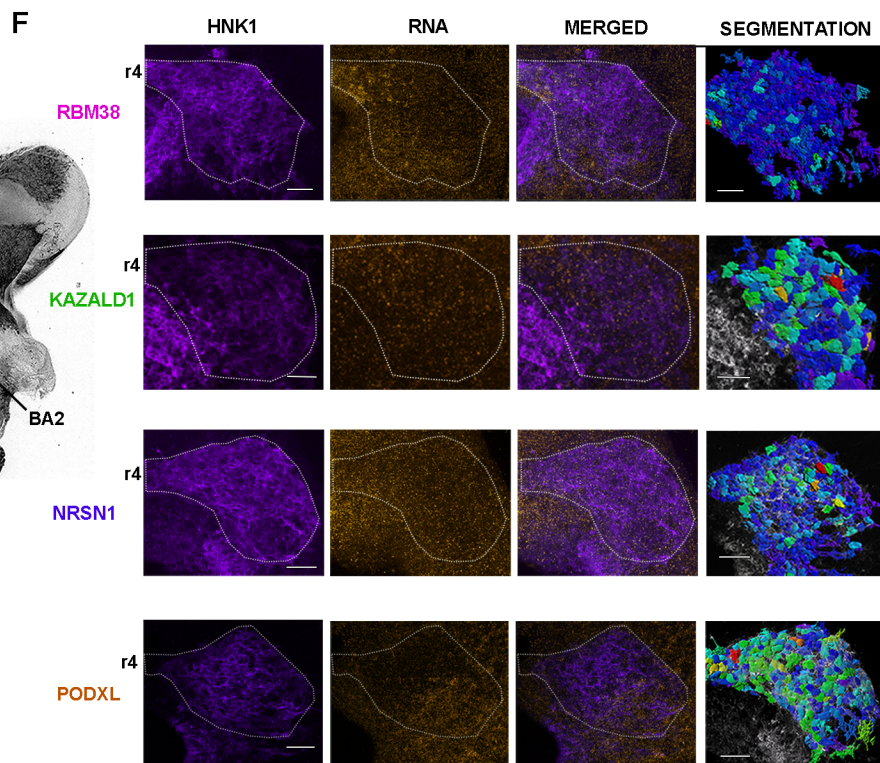

**Figure 5. Perturbing Trailblazer markers PODXL, CST3 and KIF26A alters neural crest**

**migration in vitro.** (A-E) UMAP of BA1-4 single cell transcriptomes color-coded by expression of four genes that mark BA1-4 Trailblazers (RBM38, magenta; KAZALD1, green; NRSN1, blue; PODXL, tan). (A') Inset is a magnification of the cardiac mesoderm cluster from (A) (asterisk). (F) Expression of individual BA1-4 Trailblazer NC cell markers by RNAscope fluorescent ISH labeling (orange) within individual BA2 NC cells labeled by IHC for HNK1 (purple). Segmentation shows each cell within a BA2 NC stream color-coded by the number of RNAscope spots for an individual BA1-4 Trailblazer marker, where blue is lowest and red is highest expression. (G-I) Knockdown of individual BA1-4 Trailblazer markers alters mean speed (G), mean speed (H), straightness (I) and displacement (I) in vitro. Branchial Arch (BA); Human Natural Killer-1 (HNK1); Rhombomere 4 (r4). Scalebar is 50um in (F).

378

379

380 **Perturbation of a small subset of individual Trailblazer genes altered neural crest cell**

381 **behaviors in neural tube explant cultures**

382 The knockdown of Trailblazer signature genes of BA2 led to a reduction in distance migrated by  
383 neural crest cells that colonize BA2 (Morrison 2017a). We conducted similar functional studies,  
384 to begin to assess the roles of the newly identified common BA1-4 Trailblazer signature genes  
385 within migrating neural crest cells. We knocked down a small subset (5 out of 266) of individual  
386 genes and measured changes in cell speed, straightness, and displacement from tracked cell  
387 trajectories in neural tube explant cultures (Fig. 5G-I). Morpholino knockdown of CST3  
388 significantly decreased mean cell speed, while loss-of-function of Kinesin family member 26A  
389 (KIF26A) led to a significant decrease in cell trajectory straightness, increase in mean speed  
390 and total displacement (Fig. 5G-I). Loss-of-function of Podocalyxin-like (PODXL) led to a



391 significant increase in cell speed and displacement, but a decrease in straightness (Fig. 5G-I).  
392 Thus, loss-of-function of a subset of BA1-4 Trailblazer signature genes (3 out of 5 tested)  
393 showed changes in neural crest cell behaviors in vitro.

394

395 **Neural crest Trailblazer genes are shared with a wide range of cell invasion phenomena**  
396 **in embryonic development, wound healing, and cancer metastasis**

397 Cell invasion is a hallmark in many different biological phenomena including embryogenesis,  
398 wound repair, the immune response, and cancer metastasis. To better understand the  
399 relationship of the Trailblazer transcriptional signature with these other phenomena, we  
400 compared a gene list based on 34 published cell invasion signatures (Fig. 6A-B; Suppl. Table  
401 4). To reduce bias, we ensured that the invasion signatures represented a broad range of cell  
402 types, techniques and model organisms. Because of the wide array of model organisms  
403 represented, we first ensured that the enriched genes curated from the 34 publications have an  
404 ortholog in chicken.

405

406 We find that 28 out of the 34 (82%) signatures displayed overlap of enriched genes with the  
407 BA2 Trailblazer signature (Morrison 2017a). There are 252 genes enriched in the Trailblazer  
408 signature that appear in at least one of the 34 published invasion signatures (Suppl. Table 4).  
409 Increasing the stringency of analysis revealed a group of 45 Trailblazer genes in 2 or more  
410 invasion signatures and 15 genes enriched in 3 or more invasion signatures (Fig. 6C,D). Two  
411 genes (JUN and ITGB1) are enriched in 4 invasion signatures and 1 gene (ITGB1) in 5 invasion  
412 signatures (Fig. 6D). We performed canonical pathway enrichment analysis and REVIGO  
413 analysis to explore specific functions and cellular states associated with the 45 gene invasion  
414 signature (Fig. 6E) (Suppl. Fig. 2I). This condensed signature, although not encapsulating all  
415 genes necessary for invasive characteristic, further supports the hypothesis that a common set  
416 of genes is required to achieve efficient collective cell invasion.

**A** **B** Cell Invasion Signatures (published)

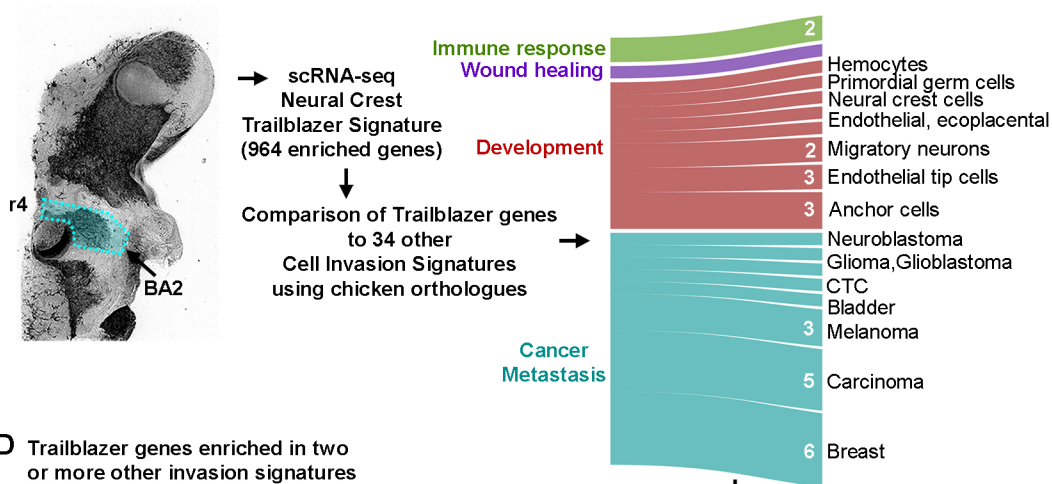

**D** Trailblazer genes enriched in two or more other invasion signatures

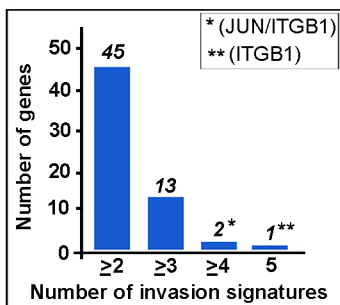

**C** 45 genes enriched in two or more cell invasion signatures as well as Trailblazer neural crest signature

|         |       |         |          |       |
|---------|-------|---------|----------|-------|
| ADM     | DAB2  | IGFBP2  | NEXN     | TUBB6 |
| ANXA1   | DKK3  | IL13RA1 | ND1      | UNC5B |
| ANXA6   | DPYD  | INHBA   | NRP1     | UPP1  |
| ARPC3   | ESM1  | ITGB1   | PRKCQ    | VEGFC |
| ATP1B1  | FLT1  | JUN     | PRNIP    | VIM   |
| BMP4    | FN1   | KCNE3   | RAC2     |       |
| CA2     | FOS   | KITLG   | RASGRP1  |       |
| COL4A4  | GILT  | KYNU    | RASGRP3  |       |
| CREB3L2 | HSPB1 | LY86    | SERPINI1 |       |
| CTNNB1  | HSPB8 | MMP11   | SH3TC1   |       |

**F** Chick embryo tumor transplant model

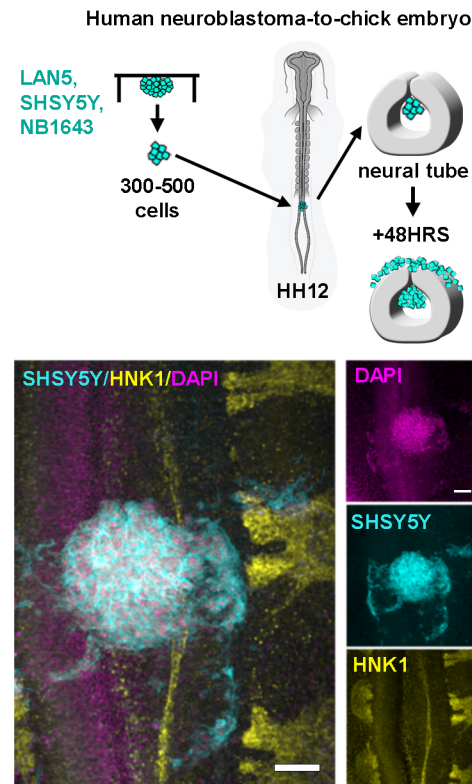

**E** Canonical pathways enriched in 45 gene cell invasion signature

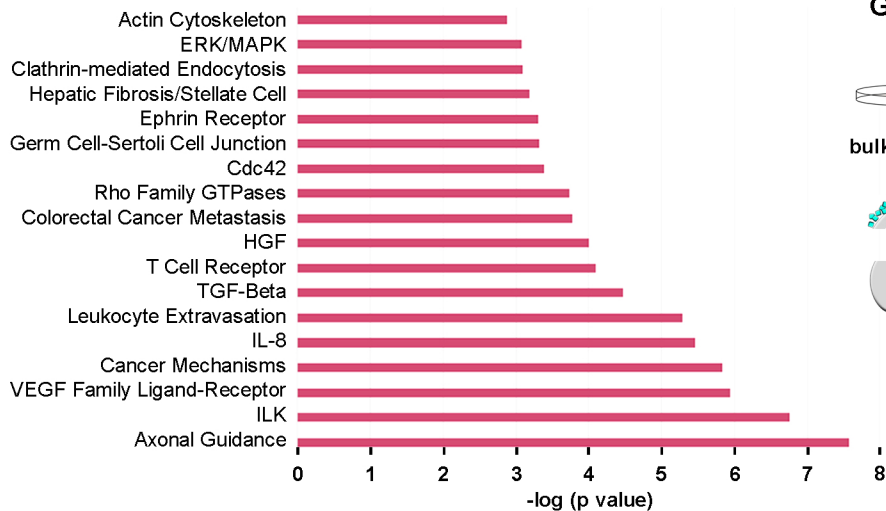

**G** Genes upregulated in invading human neuroblastoma cells vs in culture

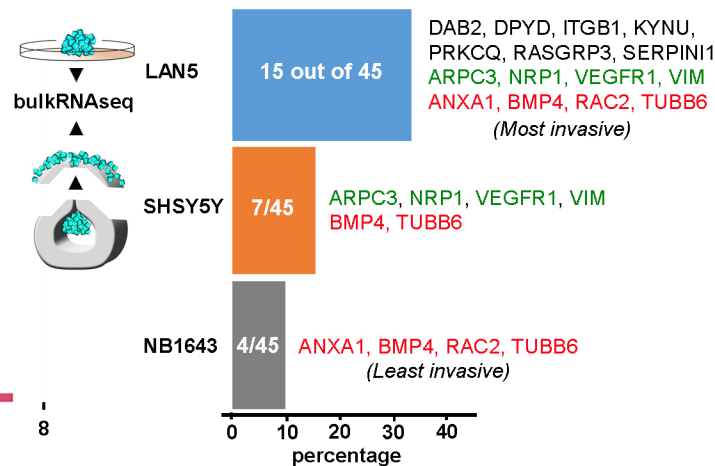

**Figure 6. Commonalities emerge when the Trailblazer signature is compared with other invasive cell types.** (A) Comparing genes enriched in BA2 Trailblazer NC cells with genes enriched in 34 invasive cell types spanning immune response, wound healing, development and metastasis (B). (C) 45 genes enriched in BA2 Trailblazers and at least 2 other invasive cell types. (D) Number genes enriched in two or more invasive cell types. (E) Canonical pathways enriched in 45 invasion signature genes. (G) Percentage of the 45 gene invasion signature enriched in migrated compared to cultured cells for neuroblastoma cell lines transplanted into the avian embryonic neural crest microenvironment. Four genes are enriched in both the least and most invasive cell types, and 2 of the 4 genes are also enriched in the SHSY5Y cells (red). Four genes are shared between the intermediate and most invasive cell types (green). 8 genes are unique to the most invasive cell type (black). Branchial Arch 2 (BA2); Rhombomere 4 (r4)

417

418

419 **Human neuroblastoma cells upregulate Trailblazer signature genes during invasion into**  
420 **the embryonic neural crest cell microenvironment**

421 To directly test whether the 45 gene cell invasion signature determined above has direct  
422 relevance to human cancer cell invasion, we took advantage of an established chick embryo  
423 transplant model (Kulesa 2006; Bailey and Kulesa 2014). First, we transplanted 3 aggressive  
424 neural crest-derived human neuroblastoma cell lines (LAN5, SHSY5Y, NB1643) into the chick  
425 trunk embryonic neural crest microenvironment (Fig. 6F). After reincubating eggs for 48hrs, we  
426 observed that a subpopulation of neuroblastoma cells invaded the chick embryonic  
427 microenvironment along host trunk neural crest cell migratory pathways and a subset of cells  
428 remained at the transplant site in each experiment (Fig. 6F). LAN5 and SHSY5Y human

429 neuroblastoma cells were highly invasive (Fig. 6F), but very few NB1643 cells exited from the  
430 transplant site (data not shown). To evaluate changes in gene expression, we manually isolated  
431 the chick trunk tissue containing the invasive human neuroblastoma cells and used FACs and  
432 RNA-seq analysis to compare gene expression changes to each of the cell populations in  
433 culture (Fig. 6F-G). We find that the LAN5 human neuroblastoma cells that were the most  
434 invasive in the chick embryonic neural crest microenvironment upregulated the largest  
435 percentage of the 45 gene panel, that is 15 out of 45 genes (33%) (Fig. 6C, G). Moderately  
436 invasive SHSY5Y cells upregulated a modest number of the 45 gene panel (6/45; 13%). In  
437 contrast, the poorly invasive NB1634 cells tended to remain at the transplant site, and the few  
438 invasive cells upregulated only 4 out of the 45 gene panel (less than 10%).

439

440 In comparing the profiles of the aggressive versus non-aggressive human neuroblastoma cells  
441 after transplantation into the chick embryo we noted several interesting gene expression  
442 differences (Fig. 6G). First, 6 out of 15 genes upregulated in the LAN5 cells were the same  
443 genes upregulated in the invasive SHSY5Y cells (Fig. 6G). This included actin cytoskeletal  
444 components ARPC3 (Arp2/3 related), TUBB6 (tubulin-related) and VIM (vimentin). Invasive  
445 LAN5 and SHSY5Y cells also showed upregulation of Vascular Endothelial Growth Factor  
446 (VEGF) receptors, VEGFR1 and Neuropilin-1 (NRP1), which is present in the chick embryonic  
447 microenvironment and is a neural crest cell chemoattractant (Fig. 6G, green) (McLennan 2010).  
448 NB1643 cells did not show upregulation of VEGF receptors, but included 4 genes in common  
449 with the LAN5 cells (Fig. 6G, red). These results suggest that the invasive ability of cells within  
450 the embryonic neural crest microenvironment may correlate with the number and type of genes  
451 upregulated from a common cell invasion signature.

452

## 453 **DISCUSSION**

454 Cranial neural crest cells migrate in distinct streams into the branchial arches where they  
455 generate most of the bone and connective tissue of the vertebrate head. In this study we have  
456 examined the cellular composition and molecular properties of neural crest cells within the  
457 different branchial arches through the application and analysis of label free single cell  
458 transcriptional profiling of cells in the avian embryo. We find that the molecular heterogeneities  
459 within the migrating cranial neural crest of BA2 and unique transcriptional signature of the most  
460 invasive cells are a common property of cranial neural crest cells at all axial levels throughout  
461 the first four branchial arches. Furthermore, perturbation of Trailblazer genes altered neural  
462 crest cell behaviors linking them with functional roles in cell migration. We find that this  
463 Trailblazer signature is shared with a wide range of cell invasion phenomenon suggesting that  
464 the invasive ability of cells within the embryonic neural crest microenvironment correlate with  
465 genes upregulated as part of a common cell invasion signature. These findings provide a rich  
466 source of information for investigating dynamic processes in neural crest cells and raises  
467 several interesting questions with respect to neural crest biology.

468  
469 Our analyses determined the cell type composition of distinct tissues within the neural crest  
470 microenvironment and identified unique gene expression differences between pre-otic and  
471 post-otic subregions as well as proximal and distal distinctions within branchial arches. We  
472 used the identification of multipotent SOX10-positive cells as a basis to discover differences  
473 in front and back cell subpopulations as well as novel, non-traditional markers of migrating  
474 neural crest cells. Distinct from SOX10-positive cells, we found a shared Trailblazer  
475 transcriptional signature within a subset of the most invasive neural crest cells within all four  
476 branchial arch streams. Trailblazer neural crest cells from all four branchial arches clustered  
477 with mesodermal cells, suggesting a high degree of transcriptional similarity between cells of

478 two different lineages; an observation that was previously reported in zebrafish (Wagner  
479 2018). Perturbation of a small subset of individual Trailblazer genes highly enriched within  
480 both the most invasive BA2 and BA1-4 neural crest cells (5 out of 964 and 5 out of 266  
481 genes, respectively) revealed changes in neural crest cell behaviors in vitro. Comparison of  
482 the BA2 Trailblazer signature with other published gene expression signatures from a broad  
483 range of cell invasion phenomena revealed an overlap of 45 out of 964 genes (in 2 or more  
484 signatures). Finally, we observed that human neuroblastoma cell invasive ability correlated  
485 with the upregulation of a subset of these 45 genes in our chick embryo transplant model.  
486

487 The identification of 7 distinct clusters in our UMAP analysis revealed a robust identification of  
488 cell type composition within the neural crest and first four branchial arch microenvironments,  
489 providing a knowledge base for discovery of novel cell type markers in space and time. For  
490 example, the faithful capture of HOX genes and other branchial arch specific genes to distinct  
491 subclusters within the SOX10-positive cluster provides a means for identification of novel  
492 markers within axial-level specific tissues (Suppl. Fig. 2A-F). This information also allowed us to  
493 map two distinct trajectories for the transition from SOX10-positive neural crest cells to the  
494 Trailblazer leaders (Suppl. Fig. 2H-J). Future work will be able to identify distinct spatio-temporal  
495 locations corresponding to neural crest cell hierarchy.

496  
497 The surprising discovery that SOX10 and other traditional markers of migrating neural crest  
498 cells did not identify the most invasive cells suggests other novel markers must be substituted to  
499 both accurately detect the neural crest cell migratory front and entire stream. For example, the  
500 964 genes enriched in our original Trailblazer neural crest signature were highly localized within  
501 cluster 4, rather than in cluster 1 (Fig. 3E-G) and we discovered a striking reduction of SOX10

502 expression in the most invasive neural crest cells (Morrison 2017a,b) (Fig. 3A-D; Suppl. Fig.  
503 2G). Thus, traditional markers of migrating neural crest cells used to mark cell position and/or  
504 specifically isolate neural crest cells may not fully capture the most invasive neural crest cells.  
505 This may lead to mistakes in assessing the timing and position of the neural crest cell streams  
506 and incomplete gene expression analysis of migrating neural crest cells common in typical  
507 isolation-required RNA-seq methods. We suggest that COL18A1, whose expression was  
508 previously described at the enteric neural crest cell wavefront (Nagy 2018), more faithfully  
509 captures migrating neural crest cells at both the front and back of the migratory streams (Suppl.  
510 Fig. 2H) and may offer a possible solution.

511

512 In vivo single cell analysis by multiplexed FISH confirmed a repertoire, rather than enhanced  
513 expression of any individual gene, represents the most invasive neural crest cells. Expression  
514 analysis of a small subset of BA1-4 Trailblazer genes confirmed the heterogeneous expression  
515 within the lead neural crest cells that we discovered in our previous extensive validation of  
516 Trailblazer gene expression (Morrison 2017a). This suggested that gain- or loss-of-function of  
517 any individual Trailblazer gene may only have modest effects on cell behaviors. This was  
518 indeed observed in vitro after loss-of-function of a small subset of individual Trailblazer genes in  
519 neural tube explant cultures, with only loss-of-function of PODXL, CST3, or KIF26A showing  
520 significant changes in cell speed, straightness, or displacement (Fig. 5). This highlighted the  
521 functional redundancy and robustness of neural crest cell migration that underlies these  
522 complex cell behaviors as critical to the formation of craniofacial and cardiovascular  
523 development. Further, neural crest cell-cell communication may overcome minor changes to a  
524 subset of cells since our knockdown method only affected a subset of the population of all  
525 premigratory neural crest. Future technical methods that allow for multiple gene manipulation in

526 a systematic manner and knockdown in every cell either in silico, in vitro, or in vivo may help to  
527 shed light on the Trailblazer network dynamics of neural crest cell invasion.

528

529 A subset of Trailblazer neural crest genes was shared in a broad range of cell invasion  
530 phenomena suggesting common collective cell migration mechanisms. In our attempt to be  
531 inclusive, we used molecular signatures that were acquired from a wide variety of methods,  
532 model organisms, and cell lines (Fig. 6). Importantly, not all cell invasion signatures included a  
533 complete transcriptome analysis. Another limitation of this comparison was a lack of exact  
534 orthologues between species. Nevertheless, the overlap of 45 out of 964 genes does provide  
535 unique molecular inroads and the in vivo neural crest model is poised to study gene network  
536 dynamics and function. This is exemplified by our results that showed human neural crest-  
537 derived neuroblastoma cells transplanted into our chick embryo model upregulated Trailblazer  
538 genes according to invasive ability and offer a rapid means to test gene candidates in human  
539 cancer metastasis.

540

541 In summary, our findings offer unprecedented single cell resolution of the molecular expression  
542 patterns that underlie neural crest cell migration and formation of the first four branchial arches  
543 during vertebrate development. Previous knowledge derived from our single cell qPCR and  
544 RNA-seq profiling of purified neural crest cells combined with the innovative label-free, non-  
545 isolation cell profiling of the entire branchial arches provided confidence in mapping cell type  
546 composition and a much richer data set to examine both neural crest and neural crest-  
547 microenvironment signaling. This allowed us to identify axial level and spatio-temporal  
548 molecular heterogeneities within the first four branchial arches; insights that would have been  
549 lost in a bulk RNA-seq analysis of the tissues or purified neural crest cells. These insights  
550 included novel markers of pre-otic, post-otic and front-to-back cell populations and the discovery  
551 of a refined Trailblazer transcriptional signature of the most invasive neural crest cells within all



552 four branchial arch streams. Mapping of the genes enriched in this refined signature to specific  
553 signaling pathways will provide for future in-depth functional experiments that begin to tease out  
554 the complex network dynamics that underlie collective cell migration and cellular hierarchy of  
555 the neural crest. The molecular signature of the neural crest compared well with other cell  
556 invasion phenomena, suggesting the exciting possibility that fundamental properties underlie  
557 development, wound healing, and cancer metastasis. The neural crest model combined with our  
558 dynamic in vivo imaging platform present a clear means to address complex questions in the  
559 biology of collective cell migration.

560

561

## 562 **METHODS**

### 563 **Single cell isolation of chick tissue**

564 All experiments were performed according to institutional and federal ethical standards.  
565 Fertilized, white leghorn chicken eggs (NCBI Taxonomy ID:9031; Centurion Poultry, Lexington,  
566 GA, USA) were incubated at 38 degrees C in a humidified incubator until the desired  
567 Hamburger and Hamilton (HH) stage (Hamburger and Hamilton 1951) of development. Embryos  
568 were screened for health and harvested into chilled 0.1% DEPC phosphate-buffered saline  
569 (PBS). To capture neural crest during active migration, branchial arches (BA) 1 and 2 were  
570 manually isolated from HH13 embryos (n=15 embryos). Branchial arches 3 and 4 were  
571 manually isolated from HH15 embryos (n=10 embryos). Each branchial arch was further  
572 manually dissected into the front 20% (distal-most) and 80% back (proximal-most) portions.  
573 Stage-, branchial arch- and tissue portion-matched tissues were pooled and dissociated as  
574 previously described (Morrison 2015). The viability and concentration of each single cell  
575 suspension was quickly confirmed on a Nexelome Cellometer Auto T4 (Nexelome Bioscience,  
576 Lawrence, MA, USA) and the cell suspensions used as input for 10X scRNA-seq (10X  
577 Genomics, San Francisco, CA, USA) per the manufacturer's recommendations.

578

### 579 **10x Chromium single-cell RNA-seq library construction**

580 Dissociated cells were loaded on a Chromium Single Cell Controller (10x Genomics,  
581 Pleasanton, CA, USA), based on live cell concentration, with a target of 4,000-10,000 cells per  
582 sample. Libraries were prepared using the Chromium Single Cell 3' Library & Gel Bead Kit v2  
583 (10x Genomics, Pleasanton, CA, USA) according to manufacturer's directions. Resulting short  
584 fragment libraries were checked for quality and quantity using an Bioanalyzer 2100 (Agilent  
585 Technologies, Santa Clara, CA, USA) and Qubit Fluorometer (Invitrogen, Waltham, MA,  
586 USA). Libraries were pooled and sequenced to a depth necessary to achieve 25-35,000 mean  
587 reads per cell, 125-520M reads each, on an Illumina HiSeq 2500 (Illumina, San Diego, CA,  
588 USA) instrument using Rapid SBS v2 chemistry with the following paired read lengths: 26 bp  
589 Read1, 8 bp I7 Index and 98 bp Read2.

590

### 591 **Bioinformatics Analysis**

592 Eight samples of 10x Genomics Chromium scRNA-seq data were sequenced on five Illumina  
593 HiSeq 2500 flowcells (Illumina, San Diego, CA, USA). Data was processed with bcl2fastq (2.20)  
594 and aligned and aggregated with CellRanger (2.1.0). Data was aligned to galGal4 using  
595 annotations from Ensembl 84. Downstream analysis was done in R (3.5.0) with the Seurat  
596 package (2.3.4) (Butler 2018). Cells were kept for downstream analysis if they had more than  
597 500 genes expressed, less than 20,000 UMIs, and less than 30% mitochondrial expression.  
598 2796 genes were selected as variable genes for downstream analysis, and the first 50 principal  
599 components were used for later steps (UMAP and cluster identification). For identifying cluster  
600 markers, we used FindAllMarkers with the minimum percentage of cells within a cluster  
601 expressing the gene set to 25% and a log fold change threshold of greater than or equal to 0.25.  
602 To further investigate some clusters, we performed subclustering by subsetting the Seurat  
603 object by cluster and running FindClusters at higher resolutions. UMAP has gained favor in

604 recent single cell analyses because it retains more of the global architecture of the data set  
605 (McInnes 2018; Becht 2019) and information may be gathered from the spatial relationship of  
606 single cell clusters (Becht 2019).

607

### 608 **Fluorescent In Situ Hybridization by RNAscope and Immunohistochemistry**

609 Integrated analysis of gene expression and protein detection in single cells was performed as  
610 previously described (Morrison 2017a,b). Briefly, RNAscope (Advanced Cell Diagnostics,  
611 Newark, CA, USA) fluorescent in situ hybridization and subsequent immunohistochemistry were  
612 carried out on fixed avian embryos. Images were acquired on a Zeiss LSM 800 laser scanning  
613 confocal microscope (Carl Zeiss, Jena, Germany) and analyzed in Imaris (Bitplane, Belfast,  
614 Northern Ireland). After the 3D boundaries of each neural crest cell were determined by the  
615 membrane-specific HNK-1 IHC signal, the number of RNAscope spots within the 3D volume of  
616 each neural crest cell were quantified.

617

### 618 **In vitro neural crest cell cultures**

619 In vitro neural tubes cultures and cell tracking analysis were performed as previously described  
620 (McLennan 2010; McLennan 2020). 2 hours prior to neural tube removal from the embryos, the  
621 dorsal portion of each neural tube was transfected with fluorescein-tagged splice modifying  
622 morpholinos targeting the trailblazer genes using in ovo electroporation as previously described  
623 (McLennan and Kulesa 2019). The 5' to 3' morpholino sequences are  
624 CGATTTTAATCTTCTGATACCTGCT for PODXL, ACATCCTGCTCAGAGCCTACCTTAG for  
625 CST3, AACAGAAAGGTGACAAACCTGATGA for Kif26a,  
626 ATCTGAGGCTCTGGGAATGGAAGAT for KAZALD1, GACGGACCTCTAAGGCTCCTCACC  
627 for RBM38 (Gene Tools, Philomath, OR, USA).

628

629

630 **Neuroblastoma Cell Lines**

631 Human neuroblastoma cell lines LAN5, NB1643 (Children's Oncology Group, Texas Tech  
632 University, USA) and SHSY5Y (ATCC, Manassas, VA, USA; CRL-2266) were maintained as in  
633 Kasemeier-Kulesa et al. 2018. Neuroblastoma cells were cultured in hanging drops and  
634 transplanted into Hamburger Hamilton (HH) stage 10 chick embryos (Kulesa 2006).

635

636 **ACKNOWLEDGEMENTS**

637 PMK would like to acknowledge the kind and generous funding from the Stowers Institute for  
638 Medical Research.

639

640 **COMPETING INTERESTS**

641 Declarations of interest: none

642

643 **DATA AVAILABILITY**

644 Original data underlying this manuscript can be accessed from the Stowers Original Data  
645 Repository at <https://www.stowers.org/research/publications/odr>. All raw and processed  
646 sequencing data generated in this study have been submitted to the NCBI Gene Expression  
647 Omnibus (GEO; <https://www.ncbi.nlm.nih.gov/geo/>) under accession number GSEXXXXXX.

648

649 **REFERENCES**

- 650 Bailey CM and Kulesa PM. 2014. Dynamic interactions between cancer cells and the embryonic  
651 microenvironment regulate cell invasion and reveal EphB6 as a metastasis suppressor.  
652 *Molecular Cancer Research* 12(9):1303-13.
- 653 Becht E, McInnes L, Healy J, Dutertre C-A, Kwok IWH, Ng LG, Ginhoux F and Newell EW.  
654 2019. Dimensionality reduction for visualizing single-cell data using UMAP. *Nature*  
655 *Biotechnology* 37:38–44.
- 656 Bothe I, Tenin G, Oseni A, Dietrich S. 2011. Dynamic control of head mesoderm patterning.  
657 *Development* 138(13): 2807-21.
- 658 Butler A, Hoffman P, Smibert P, Papalexi E, Satija R. 2018. Integrating single-cell transcriptomic  
659 data across different conditions, technologies, and species. *Nature Biotechnology* 36(5):411-  
660 420.
- 661 Etchevers HC, Dupin E, Le Douarin NM. 2019. The diverse neural crest: from embryology to  
662 human pathology. *Development* 146(5): 1-13.
- 663 Frisdal A and Trainor PA. 2014. Development and evolution of the pharyngeal apparatus. Wiley  
664 *Interdisciplinary Reviews Developmental Biology* 3(6):403-18.
- 665 Giniunaite R, Baker RE, Kulesa PM, Maini PK. 2019a. Modelling collective cell migration: neural  
666 crest as a model paradigm. *Journal of Mathematical Biology*. doi: 10.1007/s00285-019-01436-2.
- 667 Giniunaite R, McLennan R, McKinney MC, Baker RE, Kulesa PM, Maini PK. 2019b. An  
668 interdisciplinary approach to investigate collective cell migration in neural crest. *Developmental*  
669 *Dynamics*. doi: 10.1002/dvdy.124.
- 670 Hamburger V and Hamilton HL. 1951. A series of normal stages in the development of the chick  
671 embryo. *Journal of Morphology* 88(1): 49-92.

672 Kasemeier-Kulesa JC, Schnell S, Woolley T, Spengler JA, Morrison JA, McKinney MC, Pushel  
673 I, Wolfe LA, Kulesa PM. 2018. Predicting neuroblastoma using developmental signals and a  
674 logic-based model. *Biophysical Chemistry* 238: 30-8.

675 Kulesa PM, Kasemeier-Kulesa JC, Teddy JM, Margaryan NV, Seftor EA, Seftor RE, Hendrix  
676 MJ. 2006. Reprogramming metastatic melanoma cells to assume a neural crest cell-like  
677 phenotype in an embryonic microenvironment. *Proceedings of the National Academy of  
678 Sciences of the United States of America* 103(10): 3752-7.

679 Kulesa PM, McKinney MC, McLennan R. 2013b. Developmental imaging: the avian embryo  
680 hatches to the challenge. *Birth defects research. Part C, Embryo today: reviews* 99(2): 121-33.

681 Kulesa PM and McLennan R. 2015. Neural crest migration: trailblazing ahead. *F1000Prime Rep*  
682 7:02.

683 Kulesa PM, Morrison JA, Bailey CM. 2013a. The neural crest and cancer: a developmental spin  
684 on melanoma. *Cells Tissues Organs* 198(1): 12-21.

685 McInnes L, Healy J, Nelville J. 2018. UMAP: Uniform Manifold Approximation and Projection for  
686 Dimension Reduction. *arXiv:1802.03426*.

687 McLennan R, Dyson L, Prather KW, Morrison JA, Baker RE, Maini PK, Kulesa PM. 2012.  
688 Multiscale mechanisms of cell migration during development: theory and experiment.  
689 *Development* 139(16): 2935-44.

690 McLennan R, McKinney MC, Teddy JM, Morrison JA, Kasemeier-Kulesa JC, Ridenour DA,  
691 Manthe CA, Giniunaite R, Robinson M, Baker RE et al. 2020. Neural crest cells bulldoze  
692 through the microenvironment using Aquaporin 1 to stabilize filopodia. *Development* 147(1).  
693 *Methods in Molecular Biology* 1976:71-82.

694 McLennan R and Kulesa PM. 2019. In Ovo Electroporation of Plasmid DNA and Morpholinos  
695 into Specific Tissues During Early Embryogenesis.

696 McLennan R, Schumacher LJ, Morrison JA, Teddy JM, Ridenour DA, Box AC, Semerad CL, Li  
697 H, McDowell W, Kay D et al. 2015a. Neural crest migration is driven by a few trailblazer cells  
698 with a unique molecular signature narrowly confined to the invasive front. *Development* 142(11):  
699 2014-45.

700 McLennan R, Schumacher LJ, Morrison JA, Teddy JM, Ridenour DA, Box AC, Semerad CL, Li  
701 H, McDowell W, Kay D et al. 2015b. VEGF signals induce trailblazer cell identity that drives  
702 neural crest migration. *Developmental Biology* 407(1): 12-25.

703 McLennan R, Teddy JM, Kasemeier-Kulesa JC, Romine MH, Kulesa PM. 2010. Vascular  
704 endothelial growth factor (VEGF) regulates cranial neural crest migration in vivo. *Developmental*  
705 *Biology*. 339(1): 114-25.

706 Morrison JA, Box AC, McKinney MC, McLennan R, Kulesa PM. 2015. Quantitative single cell  
707 gene expression profiling in the avian embryo. *Developmental Dynamics*. 244(6): 774-84.

708 Morrison JA, McKinney MC, Kulesa PM. 2017b. Resolving in vivo gene expression during  
709 collective cell migration using an integrated RNAscope, immunohistochemistry and tissue  
710 clearing method. *Mechanisms of Development* 148: 100-106.

711 Morrison JA, McLennan R, Wolfe LA, Gogol MM, Meier S, McKinney MC, Teddy JM, Holmes L,  
712 Semerad CL, Box AC et al. 2017a. Single-cell transcriptome analysis of avian neural crest  
713 migration reveals signatures of invasion and molecular transitions. *eLIFE*.  
714 <https://doi.org/10.7554/eLife.28415.029>.

715 Nagy N, Barad C, Hotta R, Bhave S, Arciero E, Dora D, Goldstein AM. 2018. Collagen 18 and  
716 agrin are secreted by neural crest cells to remodel their microenvironment and regulate their  
717 migration during enteric nervous system development. *Development* 145(9).

718 Pietri T, Thiery JP, Dufour S. 2003. Differential expression of beta3 integrin gene in chick and  
719 mouse cranial neural crest cells. *Developmental Dynamics* 227(2): 309-13.

720 Simoes-Costa M, Tan-Cabugao J, Antoshechkin I, Sauka-Spengler T, Bronner ME. 2014.  
721 Transcriptome analysis reveals novel players in the cranial neural crest gene regulatory  
722 network. *Genome Research* 24(2): 281-90.

723 Southard-Smith EM, Kos L, Pavan WJ. 1998. Sox10 mutation disrupts neural crest development  
724 in Dom Hirschsprung mouse model. *Nature genetics* 18(1): 60-4.

725 Szabó A and Mayor R. 2018. Mechanisms of Neural Crest Migration. *Annual Review of*  
726 *Genetics* 52:43-63.

727 Tucker GC, Aoyama H, Lipinski M, Tursz T, Thiery JP. 1984. Identical reactivity of monoclonal  
728 antibodies HNK-1 and NC-1: conservation in vertebrates on cells derived from the neural  
729 primordium and on some leukocytes. *Cell differentiation* 14(3): 223-30.

730 Vincent M, Duband JL, Thiery JP. 1983. A cell surface determinant expressed early on  
731 migrating avian neural crest cells. *Brain Research* 285(2): 235-8.

732 Wagner DE, Weinreb C, Collins ZM, Briggs JA, Megason SG, Klein AM. 2018. Single-cell  
733 mapping of gene expression landscapes and lineage in the zebrafish embryo. *Science*  
734 360(6392): 981-87.

735

736

737

738

739

740

741

742
